# Supplementary material for: The NASSS-CAT Tools for Understanding, Guiding, Monitoring, and Researching Technology Implementation Projects in Health and Social Care: Protocol for an Evaluation Study in Real-World Settings
Source: PubMed Central journal article supplement (PMC7254278; doi:10.2196/16861), 2020-05-13
Supplement: resprot_v9i5e16861_app1.pdf [file resprot_v9i5e16861_app1.pdf]

**TABLE 1: CHARACTERISTICS OF THE SIX CASE STUDIES**

| Criterion                       | Case 1: Patient portal for people with schizophrenia                                                                                 | Case 2: Digitisation of multidisciplinary cancer meetings                                                                                                            | Case 3: Extending video consultations to underserved groups                                                                                                       | Case 4: Support for EU Falsified Medicines Directive                                                                                       | Case 5: Video-mediated social connection technologies                                                                                                                                 | Case 6: Digitisation of histopathology services                                                                    |
|---------------------------------|--------------------------------------------------------------------------------------------------------------------------------------|----------------------------------------------------------------------------------------------------------------------------------------------------------------------|-------------------------------------------------------------------------------------------------------------------------------------------------------------------|--------------------------------------------------------------------------------------------------------------------------------------------|---------------------------------------------------------------------------------------------------------------------------------------------------------------------------------------|--------------------------------------------------------------------------------------------------------------------|
| Country / geographical setting  | Sweden                                                                                                                               | UK (South East)                                                                                                                                                      | UK (inner London, Scottish Highlands, south Wales) and remote parts of Australia                                                                                  | UK-wide                                                                                                                                    | Various localities in UK and Norway                                                                                                                                                   | UK (South East)                                                                                                    |
| Target population and condition | Adults with psychosis registered with a specialist public mental health service                                                      | Patients with known or strongly suspected cancer                                                                                                                     | Outpatients who have rarely been offered video consultations in the past e.g. limited English speakers, prisoners, care home residents, abused women              | All patients taking prescription medicines                                                                                                 | Older people living alone who wish to have more social contact, especially with their relatives                                                                                       | Patients having surgical biopsies e.g. for suspected cancer                                                        |
| Technology                      | Point-of-care dashboard offering a visual overview of progress (including questionnaires for symptoms and functioning) and planning. | A third-party software tool that pulls data from the electronic record and allows visualisation of key cancer markers and images, thereby supporting team discussion | Video mediated communication software e.g. Skype™, Facetime™, AttendAnywhere™, used by staff on NHS desktops and by patients on their home computer or smartphone | Hardware and software to support end-to-end quality assurance of prescription medicines from manufacturer to patient supply in pharmacies. | For the older person, a 'retro' designed box that looks like a TV set (or which links to their own TV) and has a simple on-off and volume switch. For the relatives, a smartphone app | Whole-slide imaging and related technologies that allow digital storage, indexing and exchange of biopsy specimens |
| Sector                          | Secondary care                                                                                                                       | Secondary and tertiary care                                                                                                                                          | Primary and secondary care NHS providers, prisons, care homes, third-sector settings                                                                              | Hospital and community pharmacies                                                                                                          | Social care                                                                                                                                                                           | Secondary and tertiary care                                                                                        |
| Main goal of the project        | Improving patient engagement with their own care; care planning; audit                                                               | Improving quality and efficiency of MDT meetings and ensuring timely recording of decisions in patient's record                                                      | Extension of video consultation services to various underserved groups                                                                                            | Assuring the quality of medicines and building confidence in EU pharmaceutical suppliers                                                   | Uptake and roll-out of social connection technologies in different settings (e.g. care homes, private dwellings)                                                                      | A fully digitised regional histopathology service; better use of specialist staff time                             |
| Policy context                  | High numbers of patients with schizophrenia, who are seen as a 'vulnerable group', with low engagement and compliance                | Service under extreme pressure; rising case load                                                                                                                     | 'Care closer to home' policy – video tech seen as potentially reducing outpatient load                                                                            | EU Falsified Medicines Directive                                                                                                           | Emerging national crisis of isolated and lonely older people                                                                                                                          | National workload and workforce crisis (shortage of pathologists)                                                  |
| Project framed primarily as     | Empowering patients                                                                                                                  | Efficiency and safety                                                                                                                                                | Increasing access to digitally-enabled services                                                                                                                   | Quality assurance and safety                                                                                                               | Responding to demographic changes                                                                                                                                                     | Quality and efficiency                                                                                             |
